# Supplementary material for: Apocynaceae wood evolution matches key morphological innovations
Source: PubMed Central journal article supplement (PMC11584039; doi:10.1002/ajb2.16436), 2024-11-22

**Beckers et al.—American Journal of Botany 2024—Appendix S5.** visualization of ancestral state reconstructions with species names as tip labels and reconstructions not included in the main text.

# Maximum likelihood mapping of vessel diameter

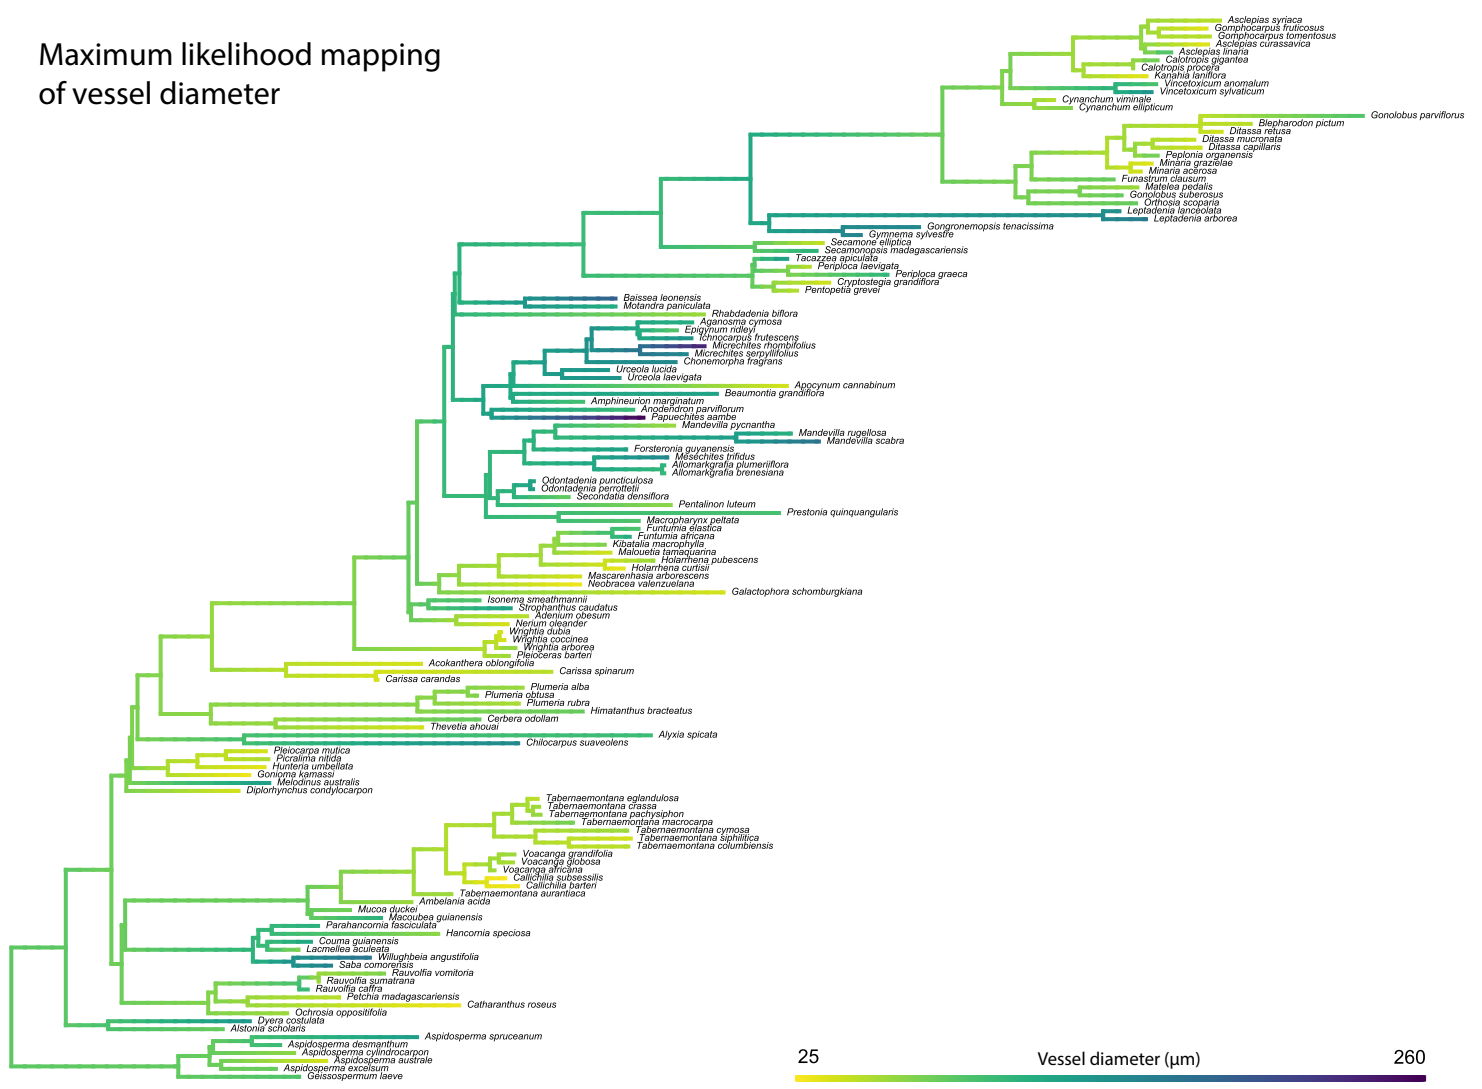

25 Vessel diameter (μm) 260

# Maximum likelihood mapping of vessel density

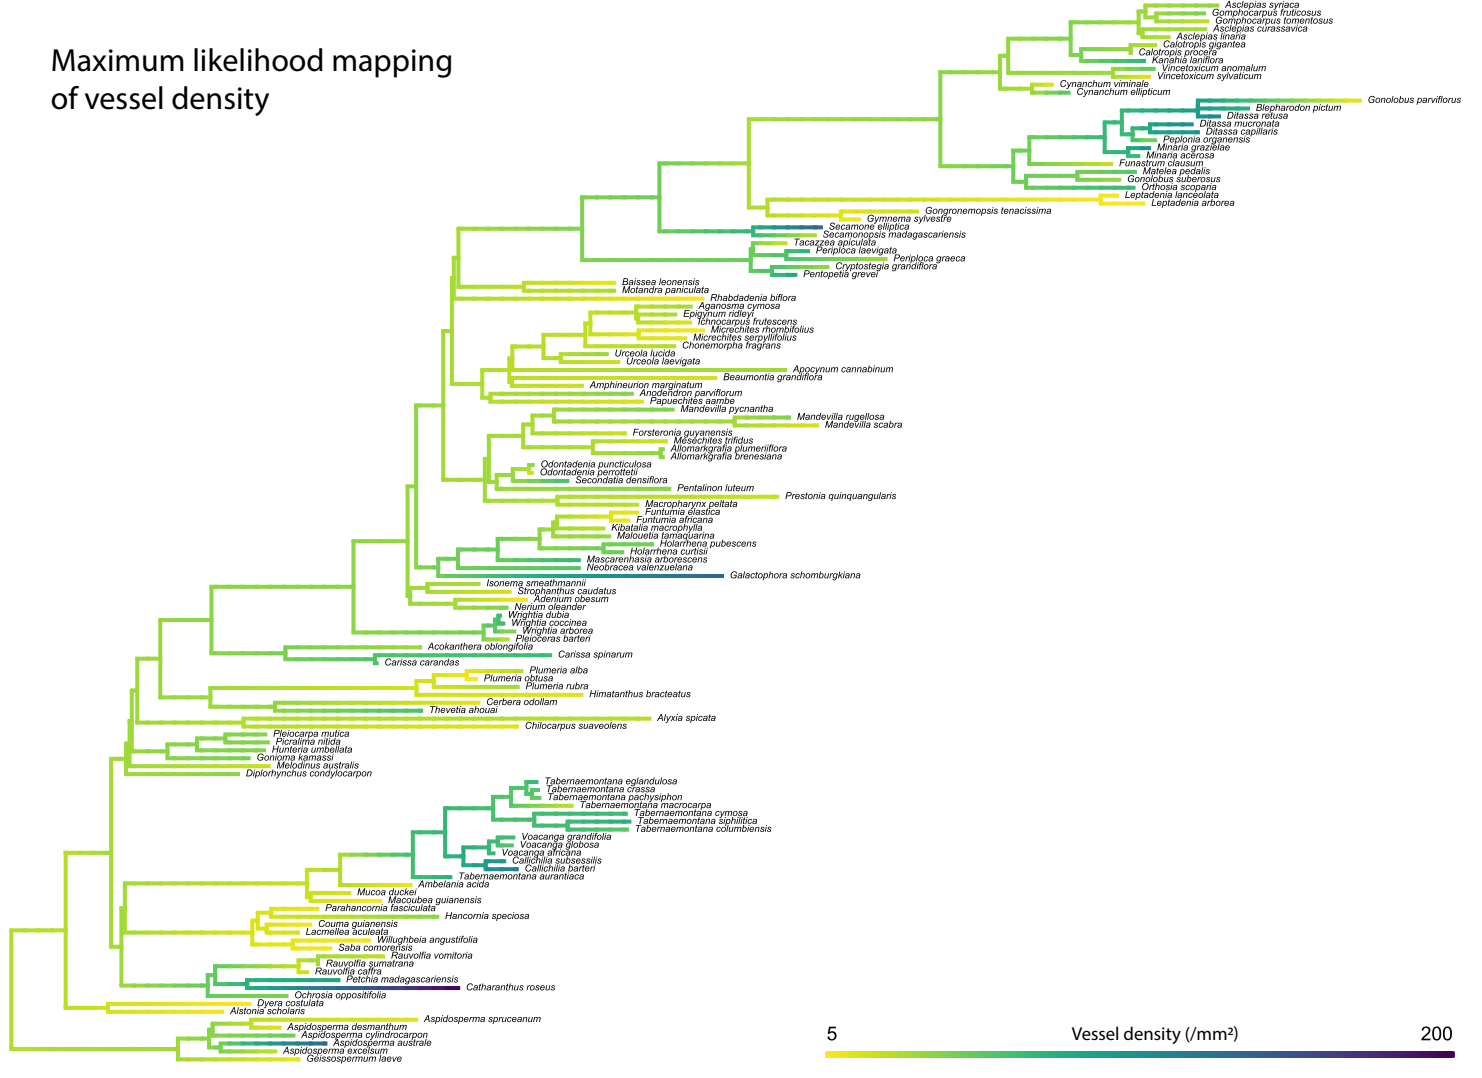

5 Vessel density (/mm²) 200

# Maximum likelihood mapping of fibre length

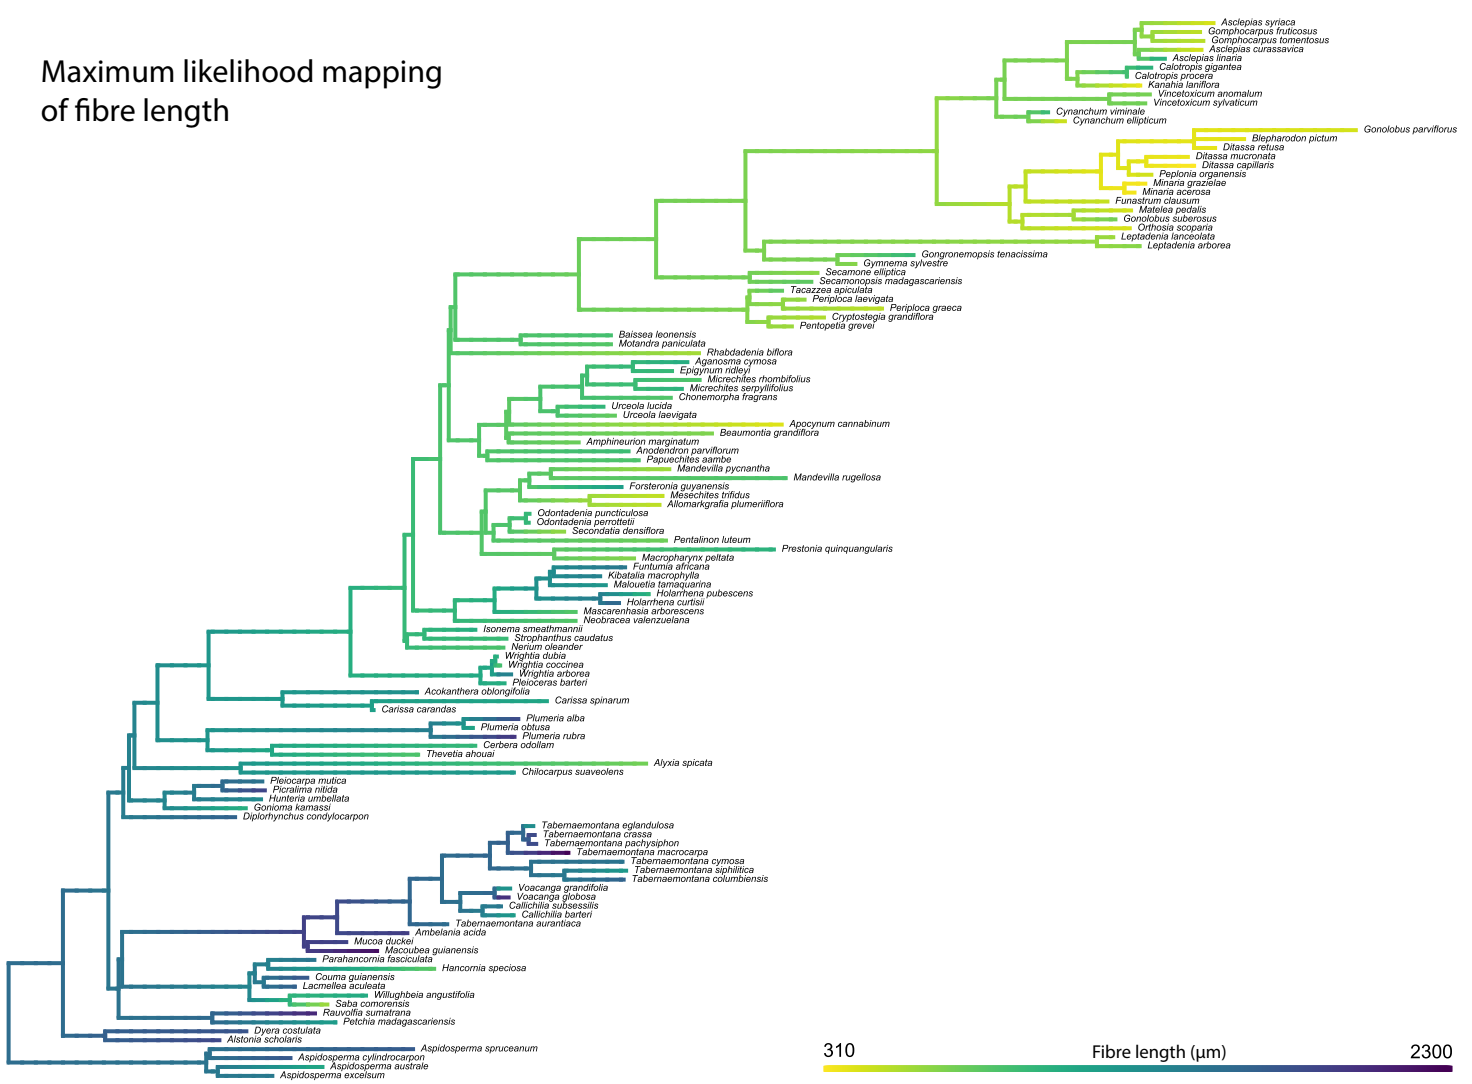

# Maximum likelihood mapping of vessel element length

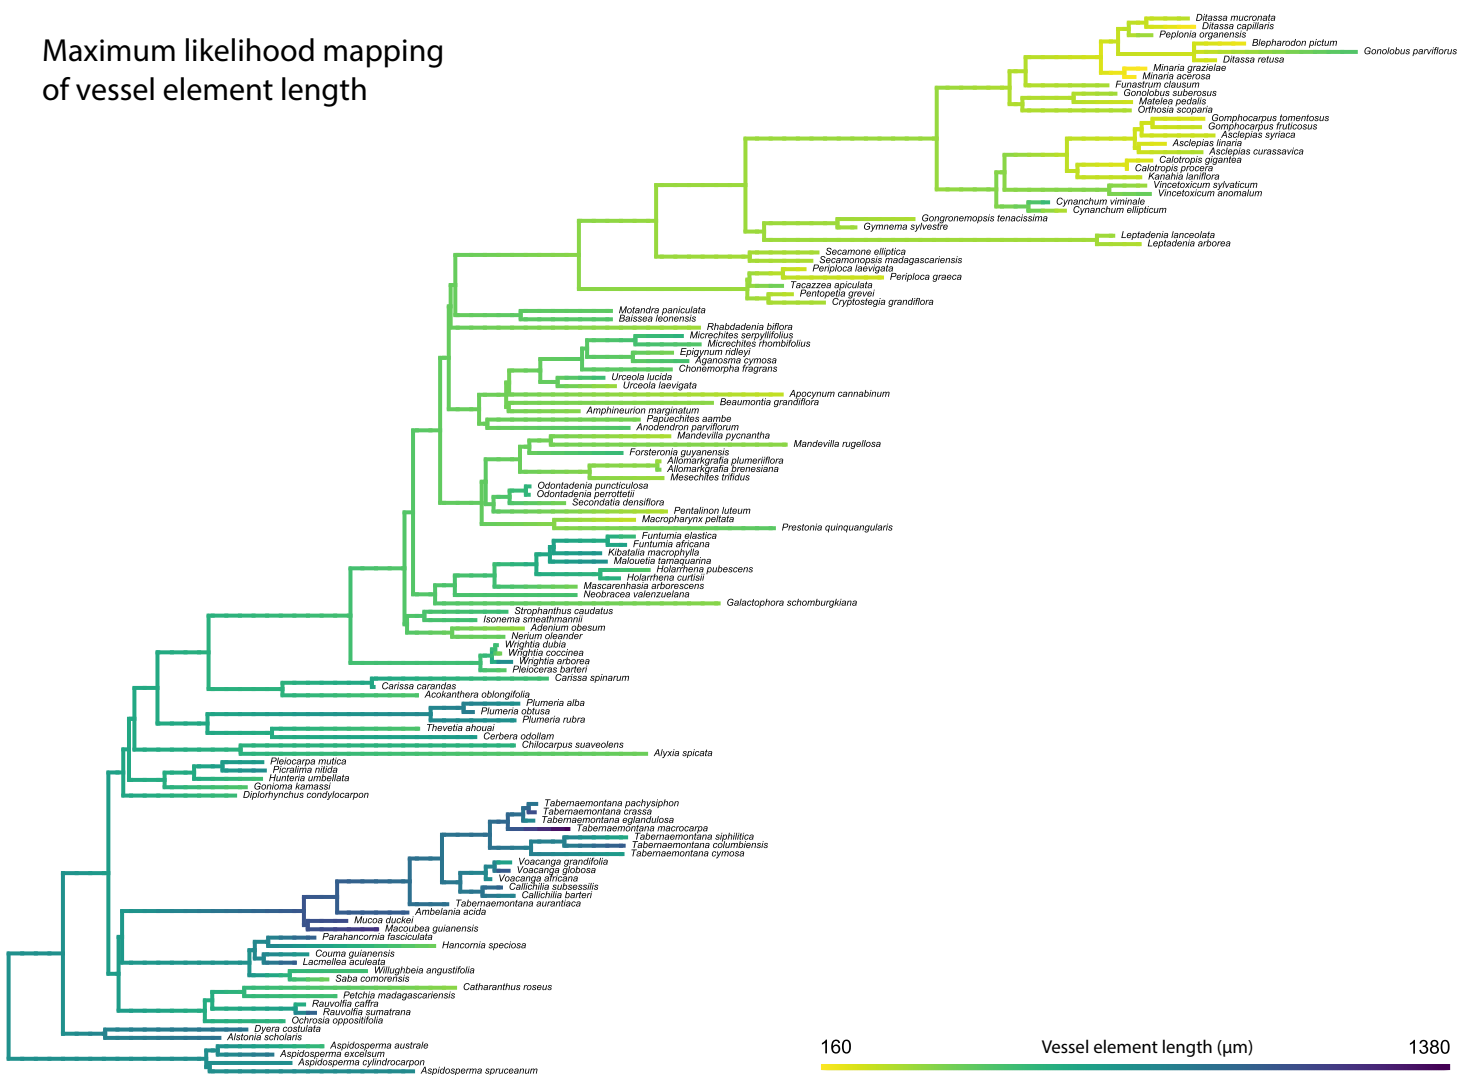

# Maximum likelihood mapping of maximum plant height

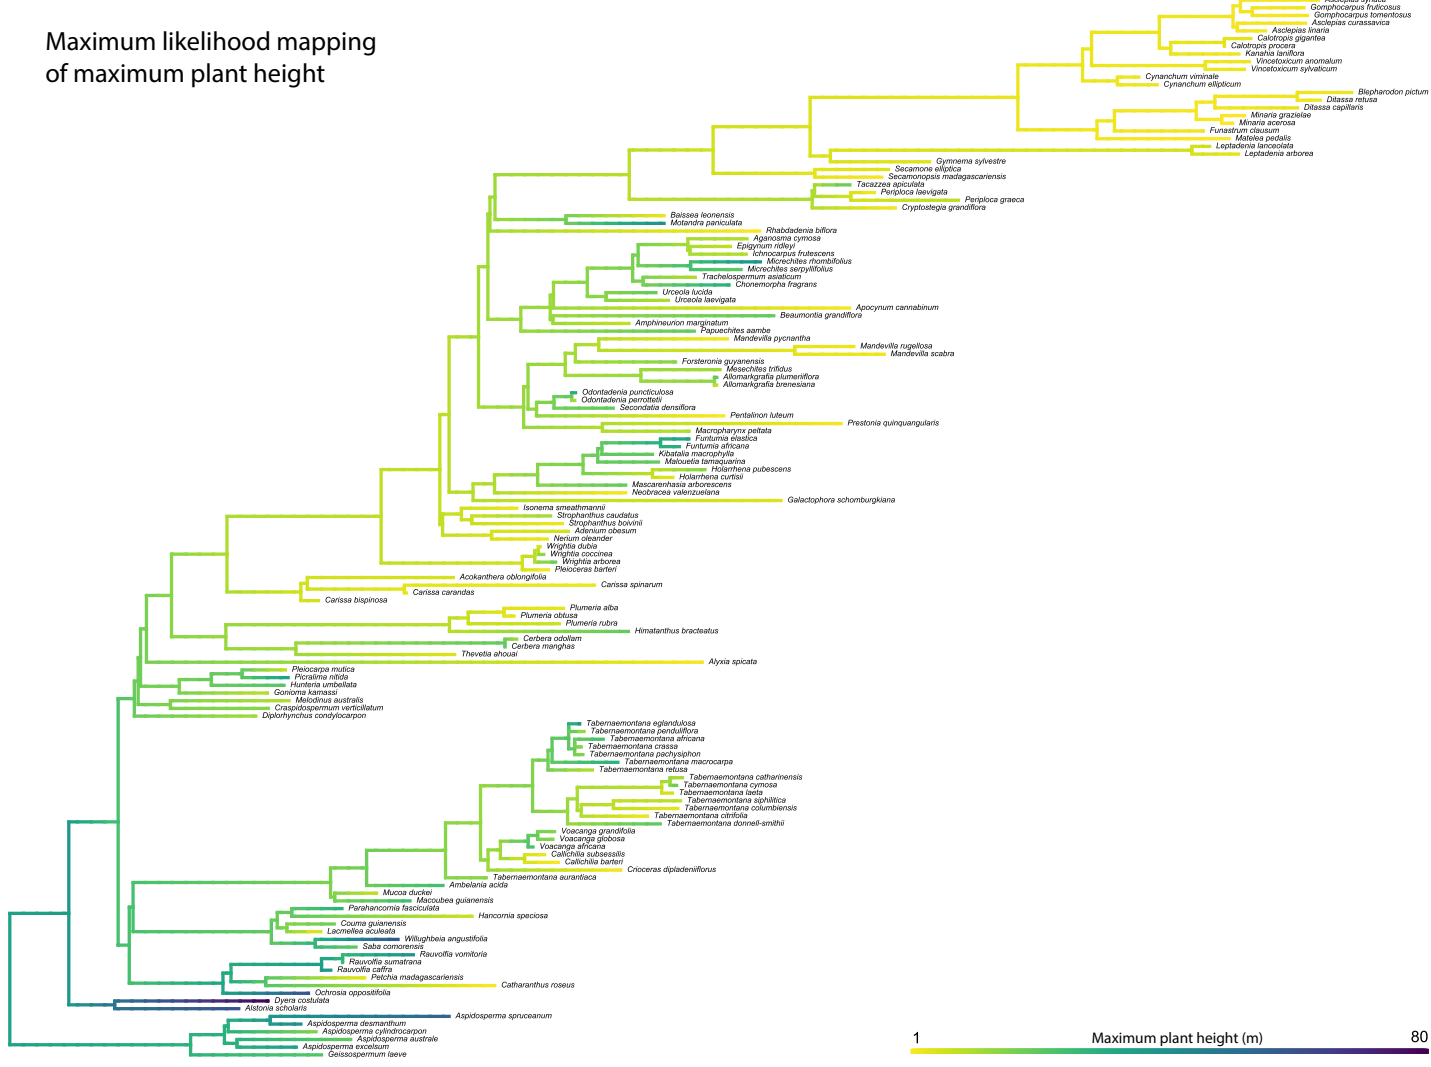

# Maximum likelihood mapping of ray height

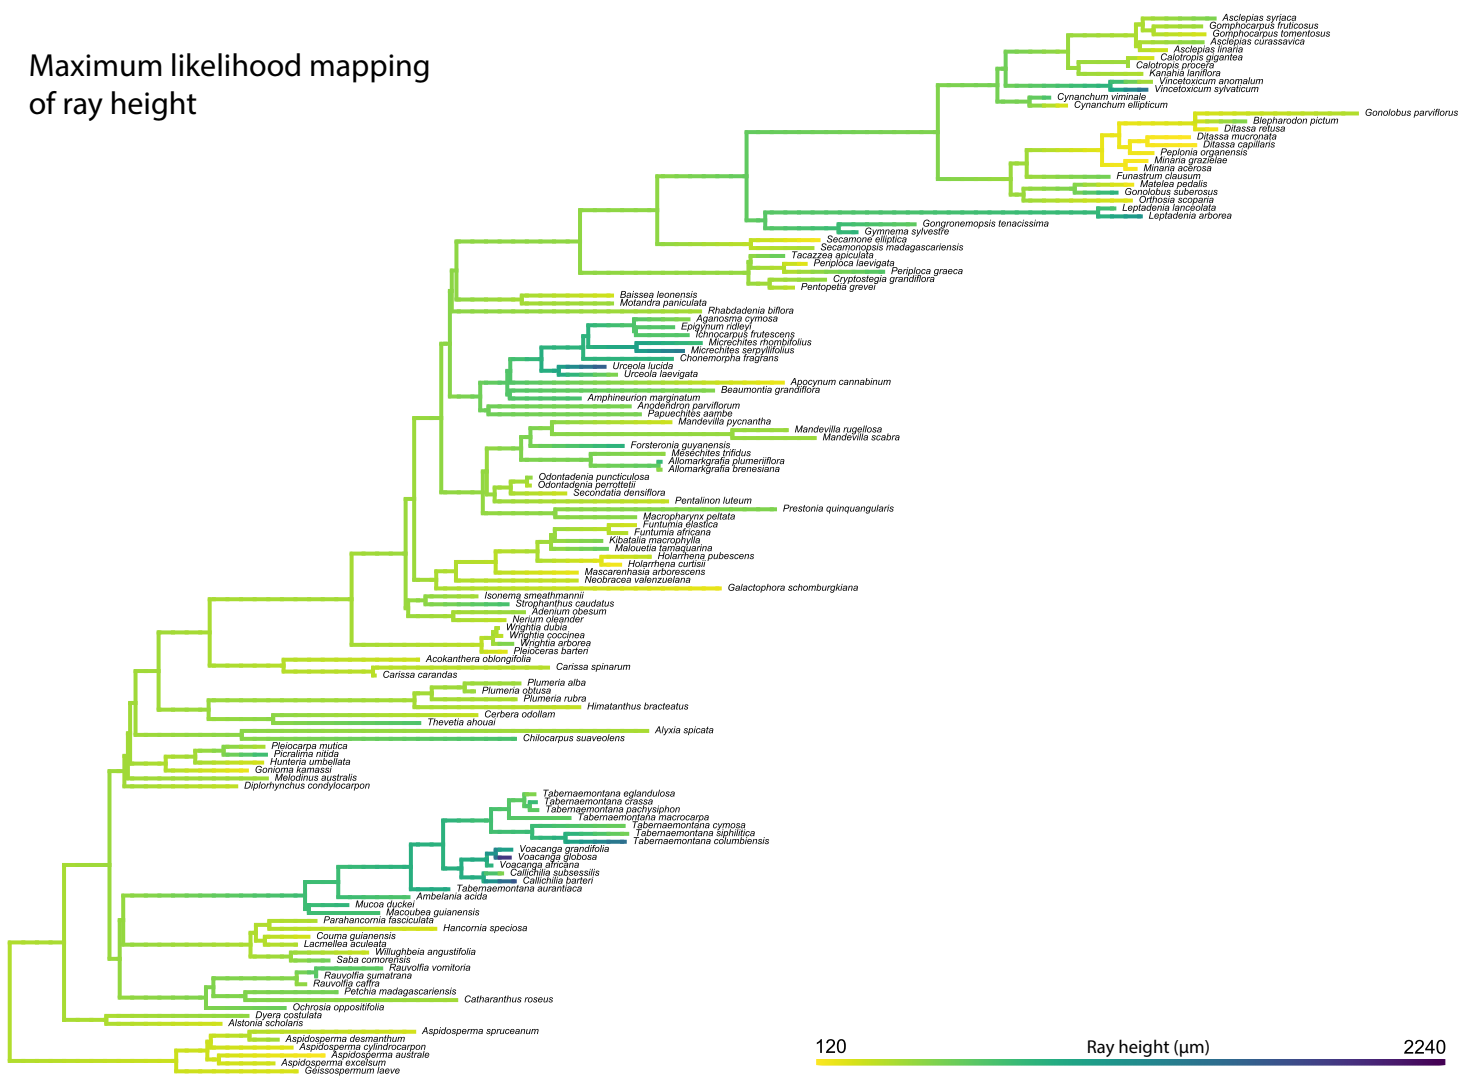



Growth from

- Climbing
- Climbing+Erect
- Erect

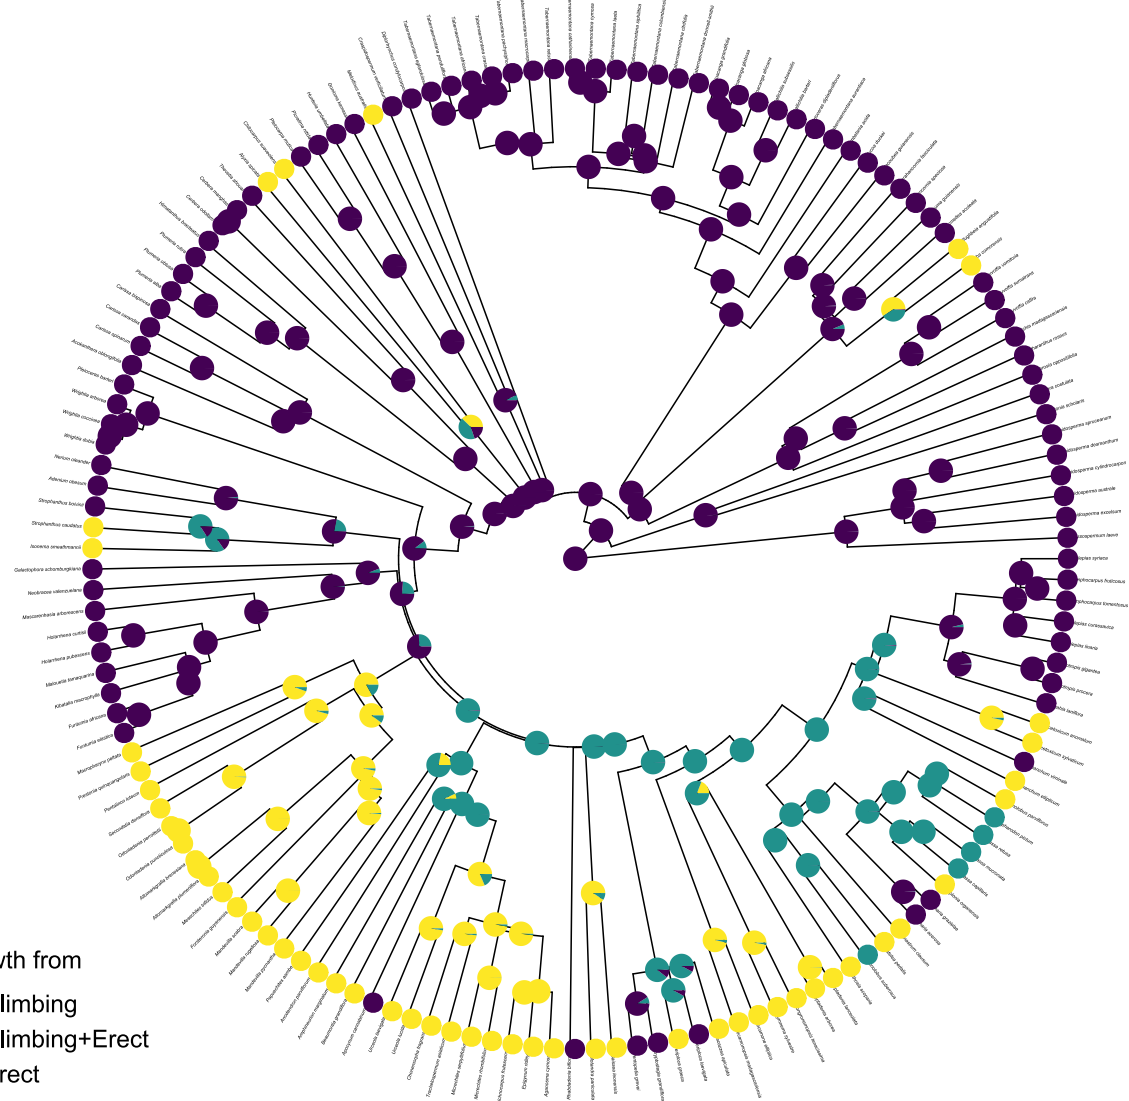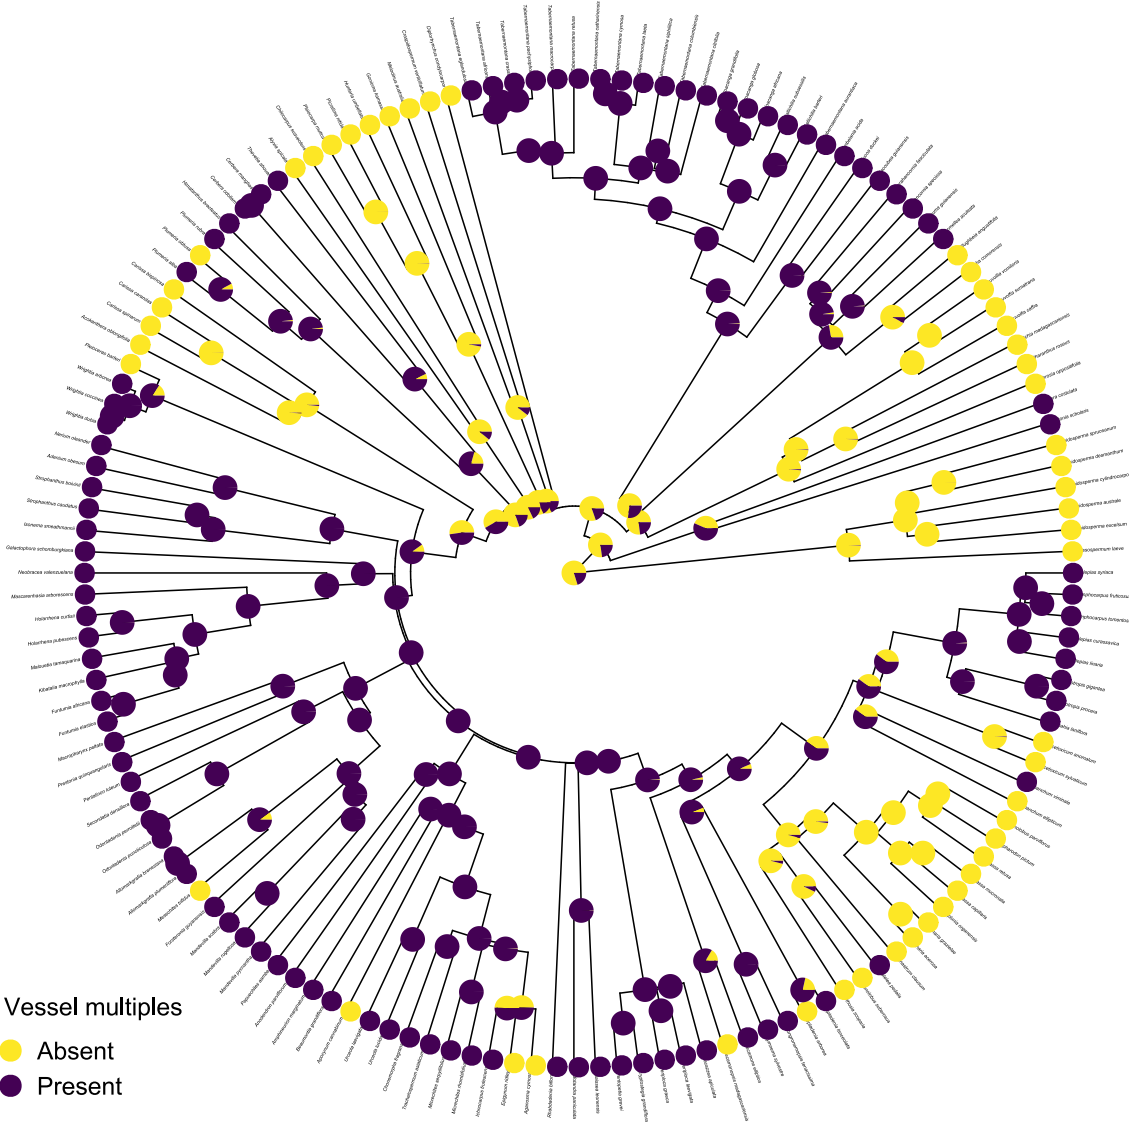

Vessel multiples

- Absent
- Present

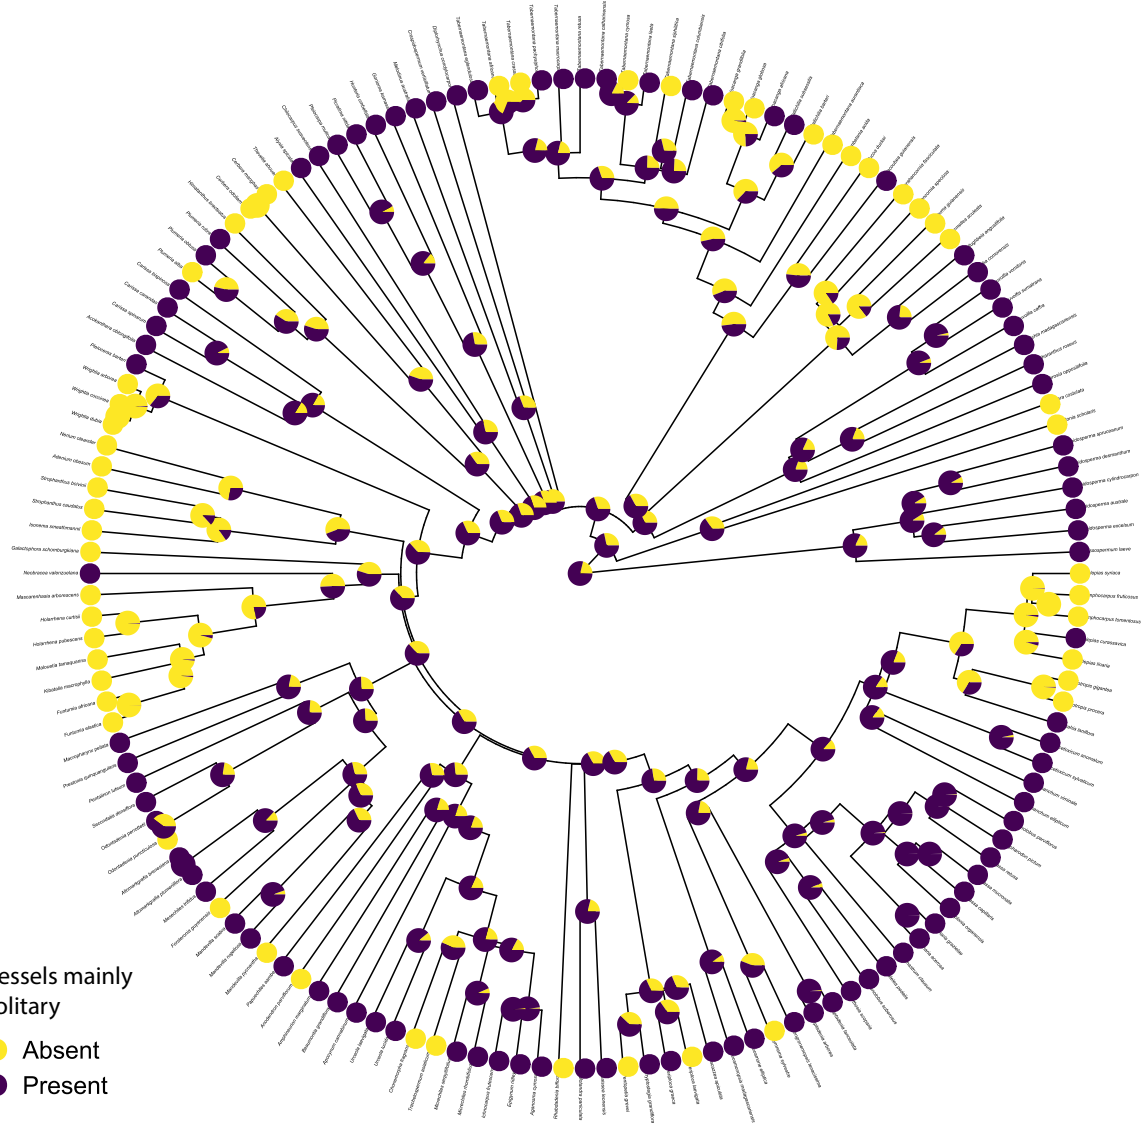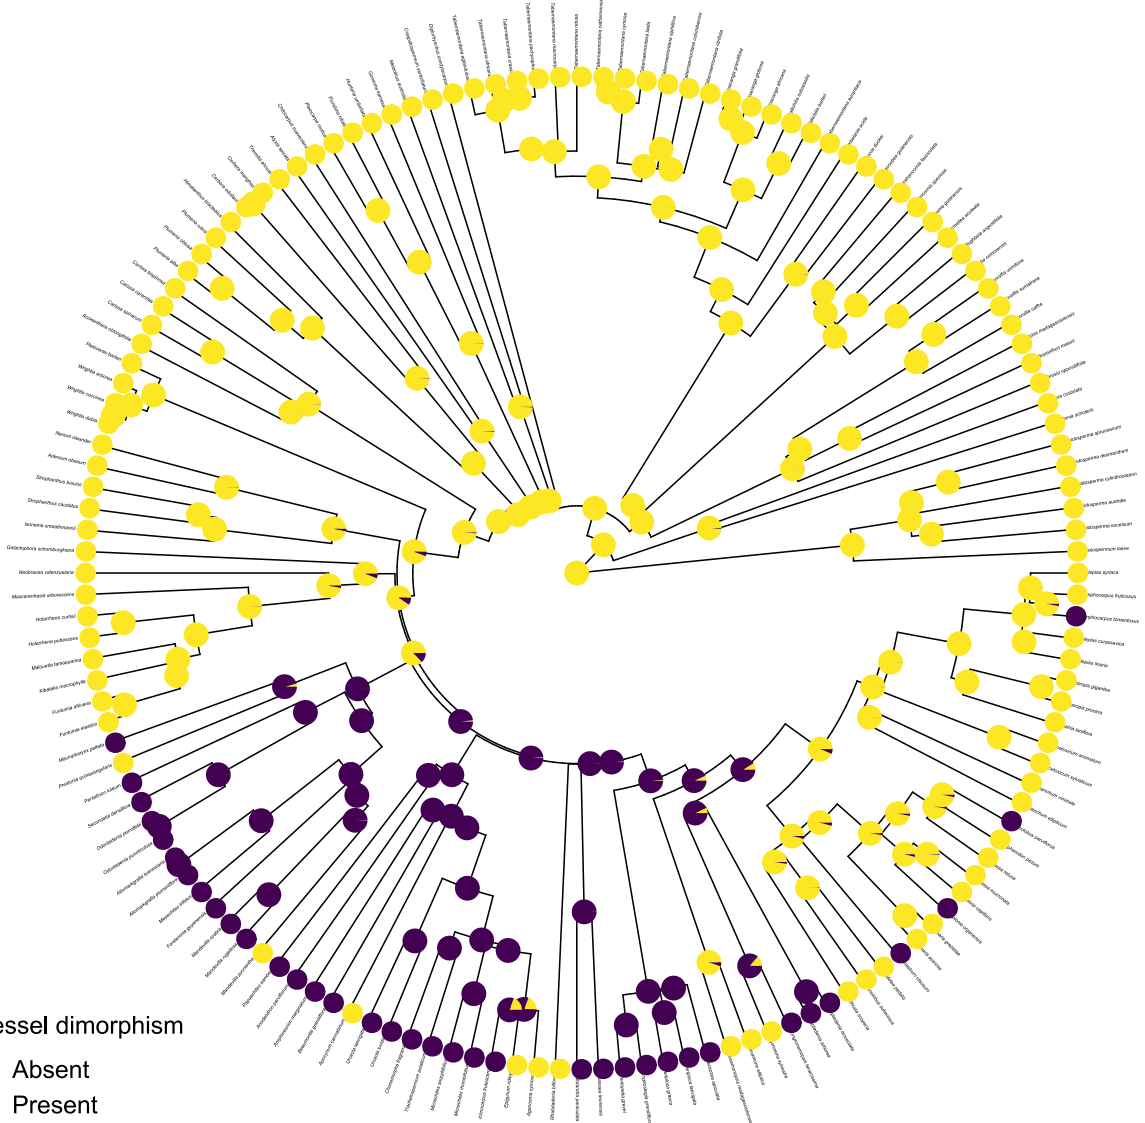

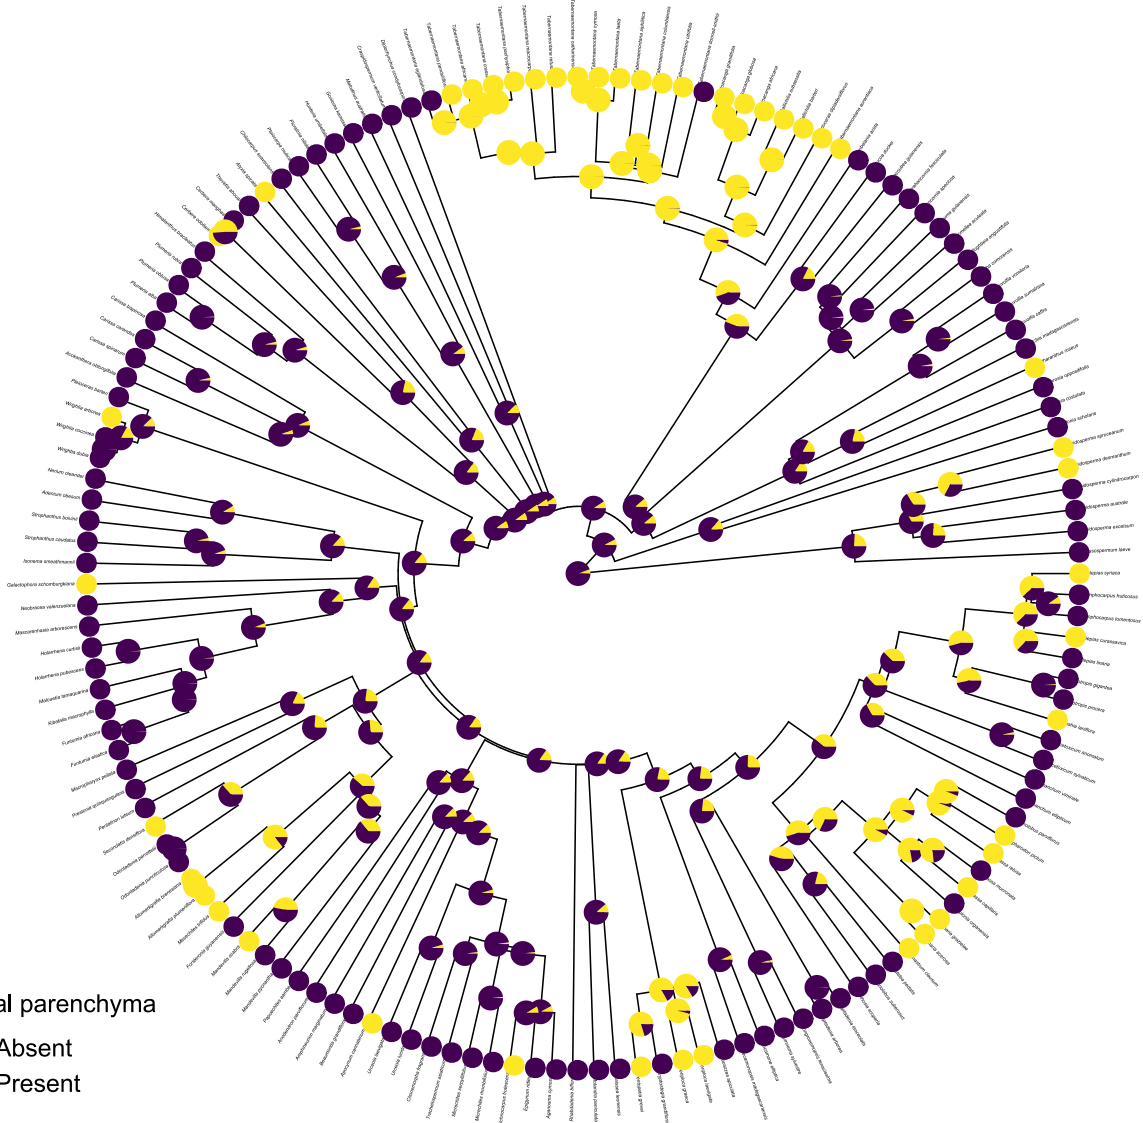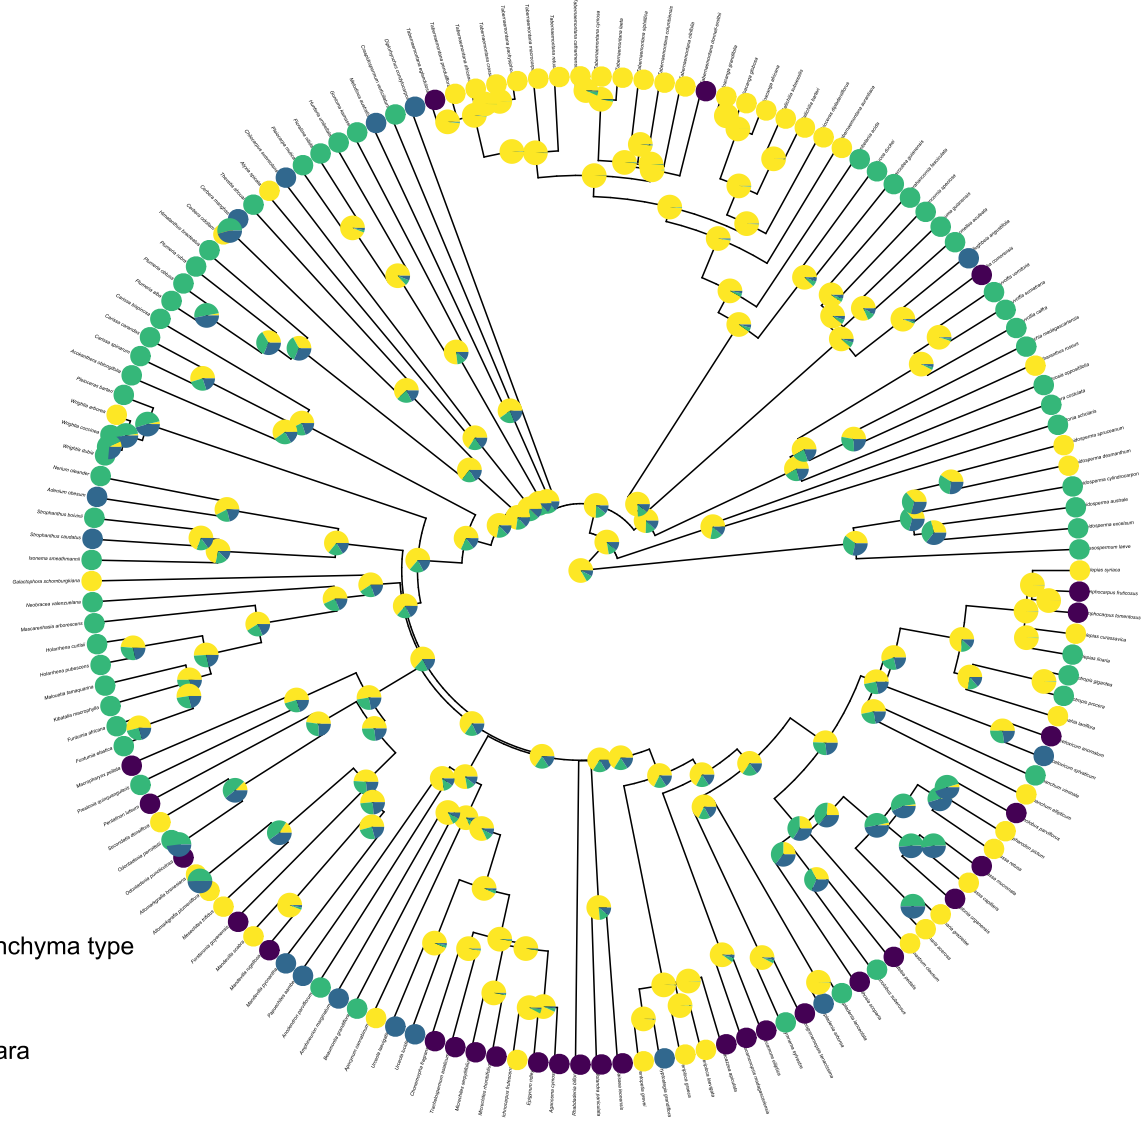

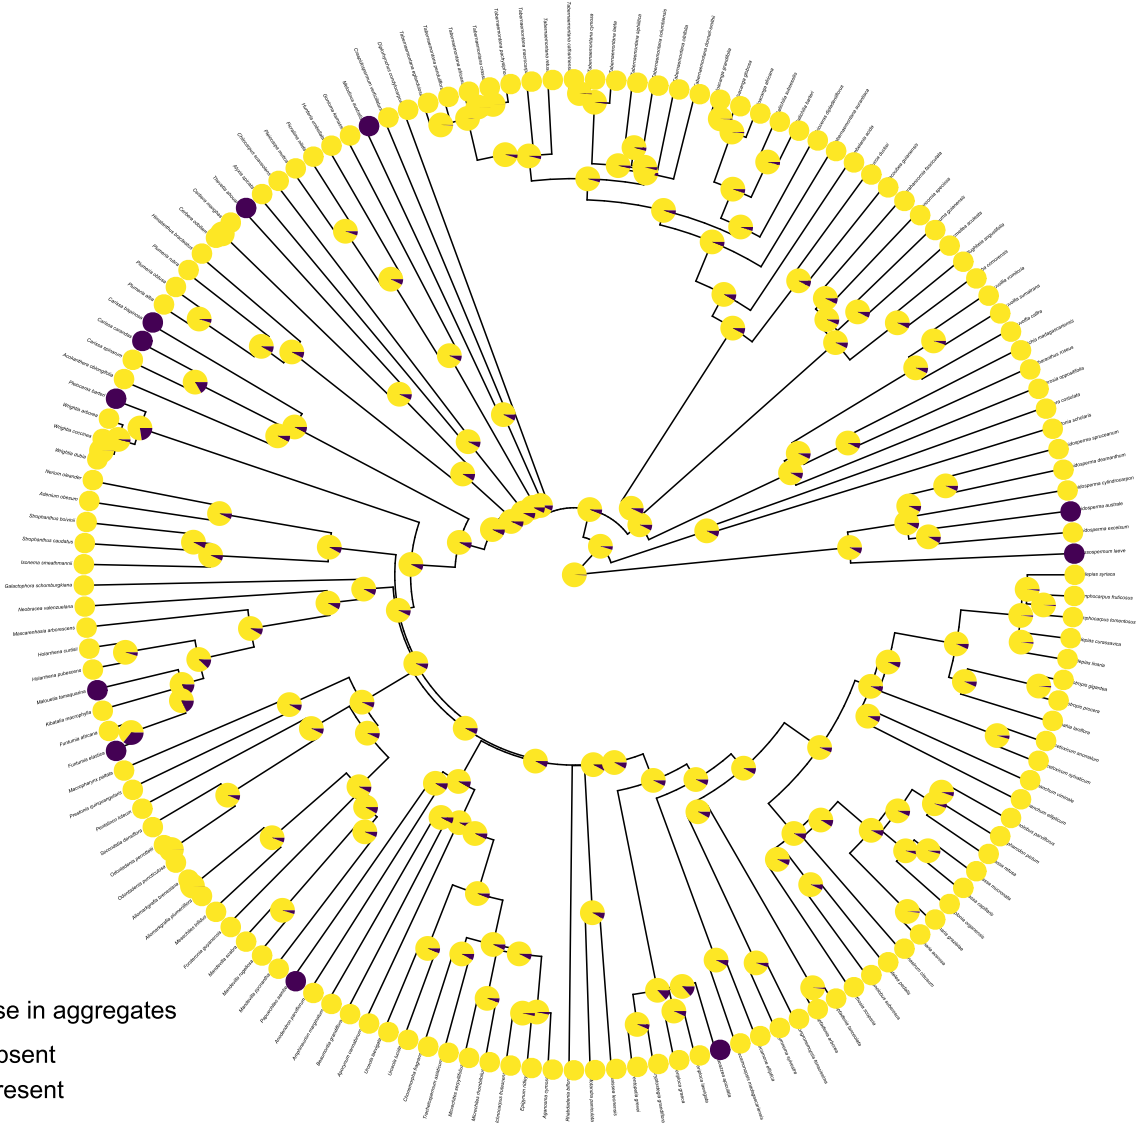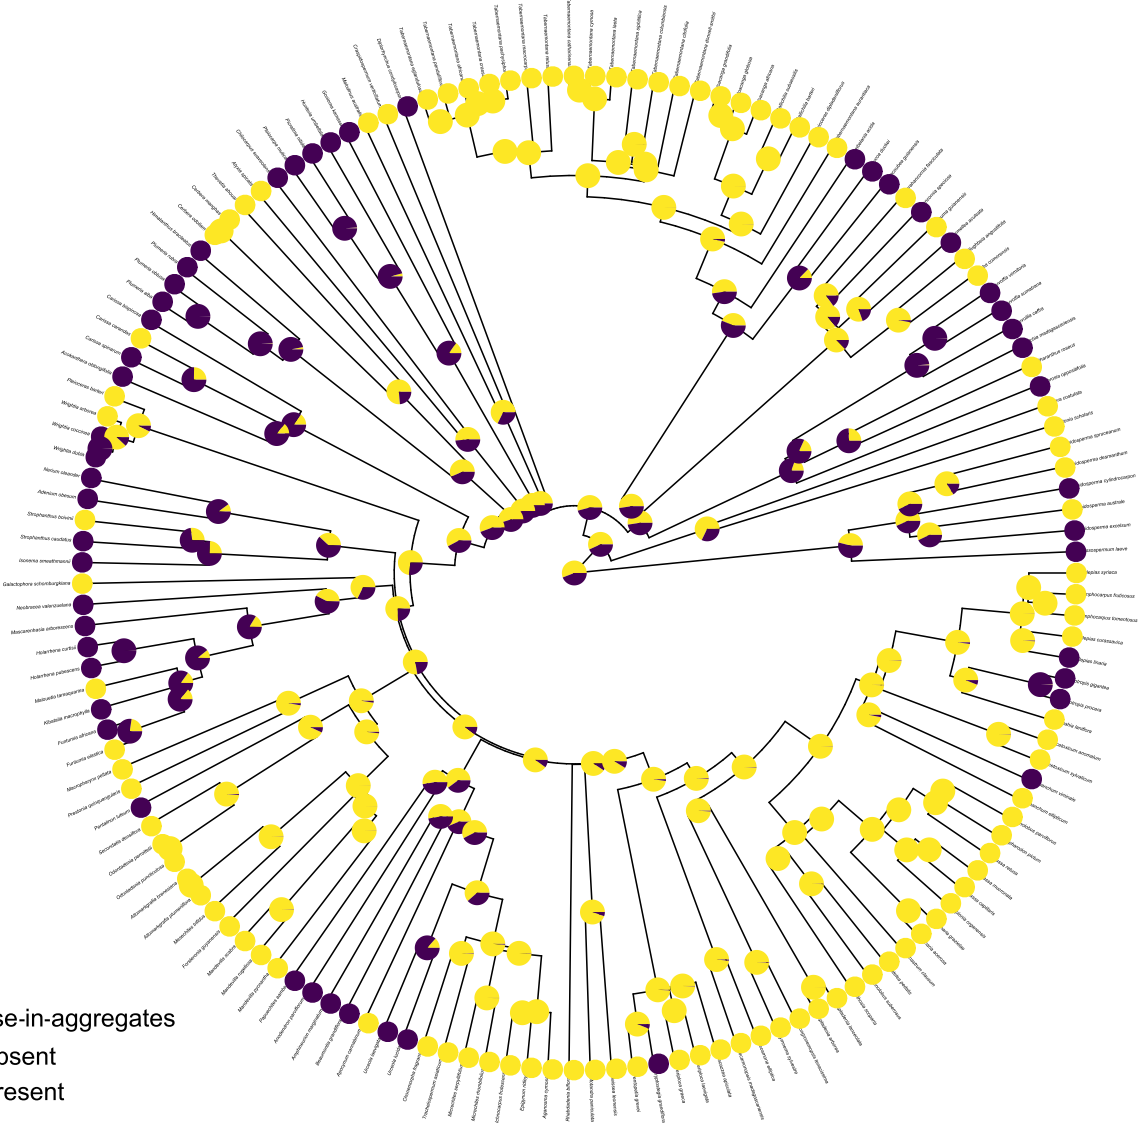



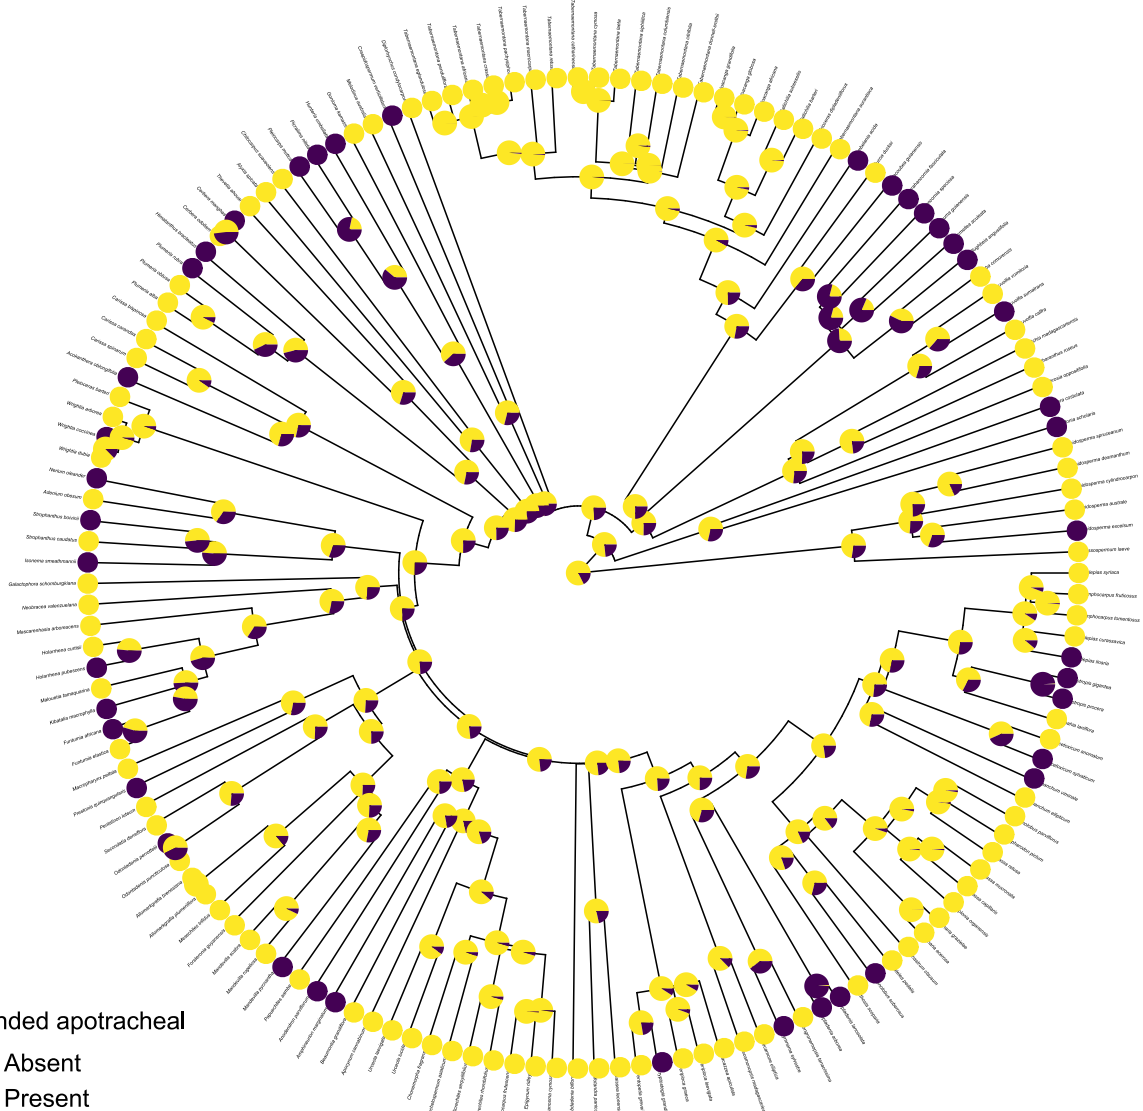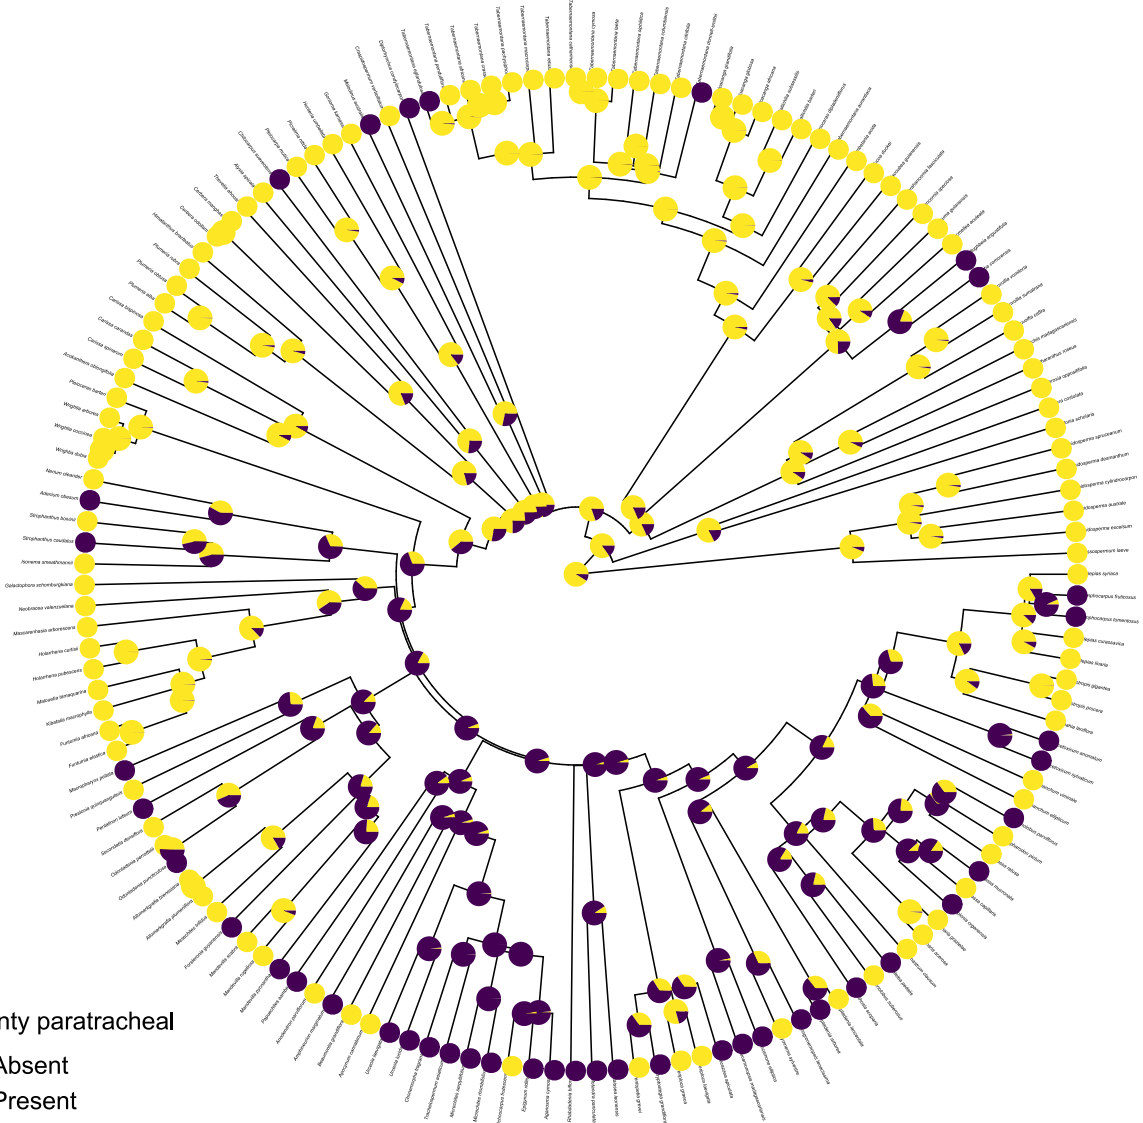

Vasicentric  
paratracheal axial  
parenchyma

- Absent
- Present

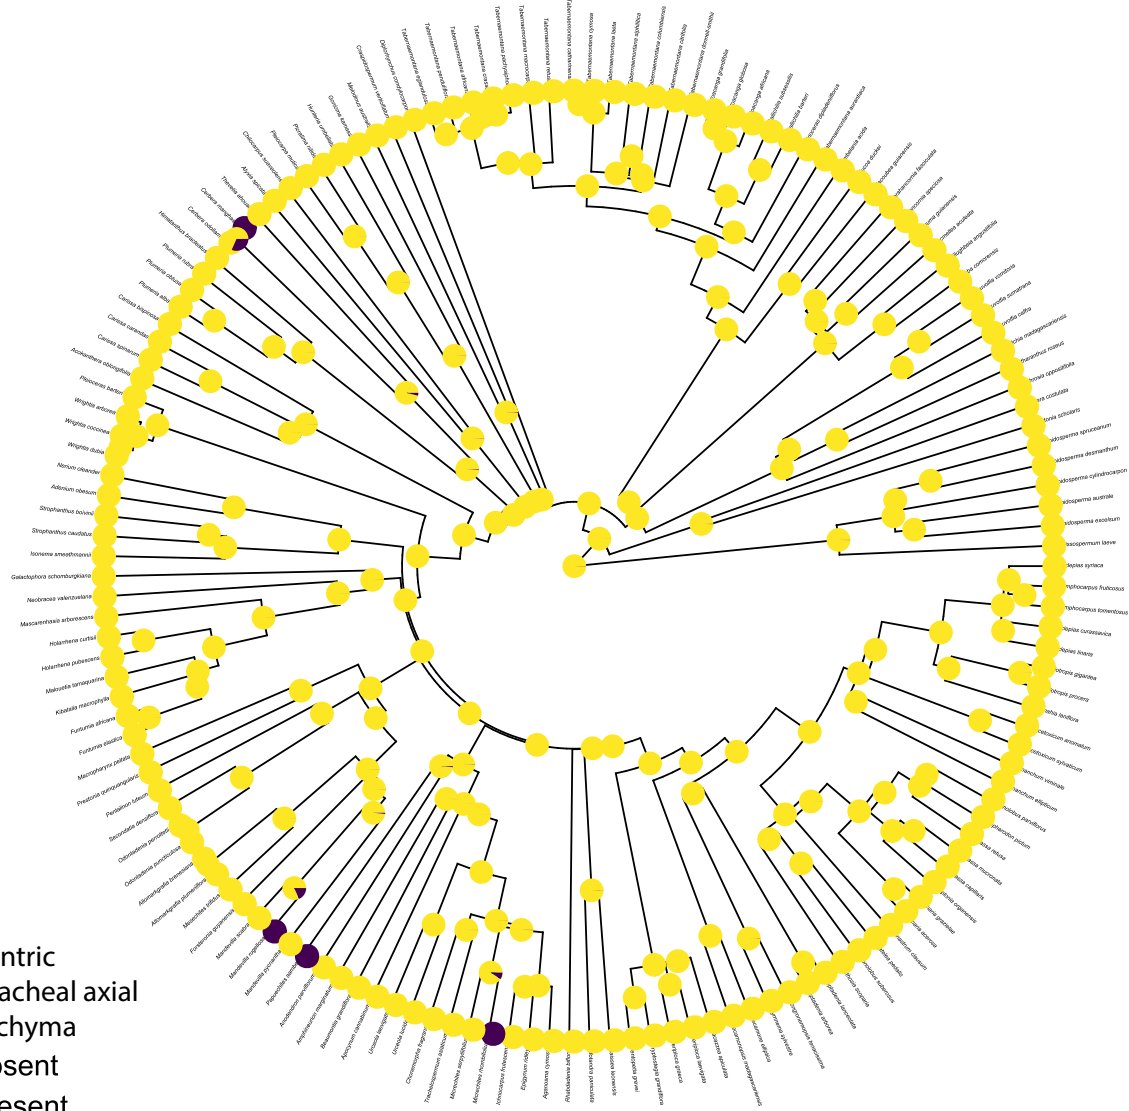

Fibre cell  
wall thickness

- Thick
- Thin
- ThinThick

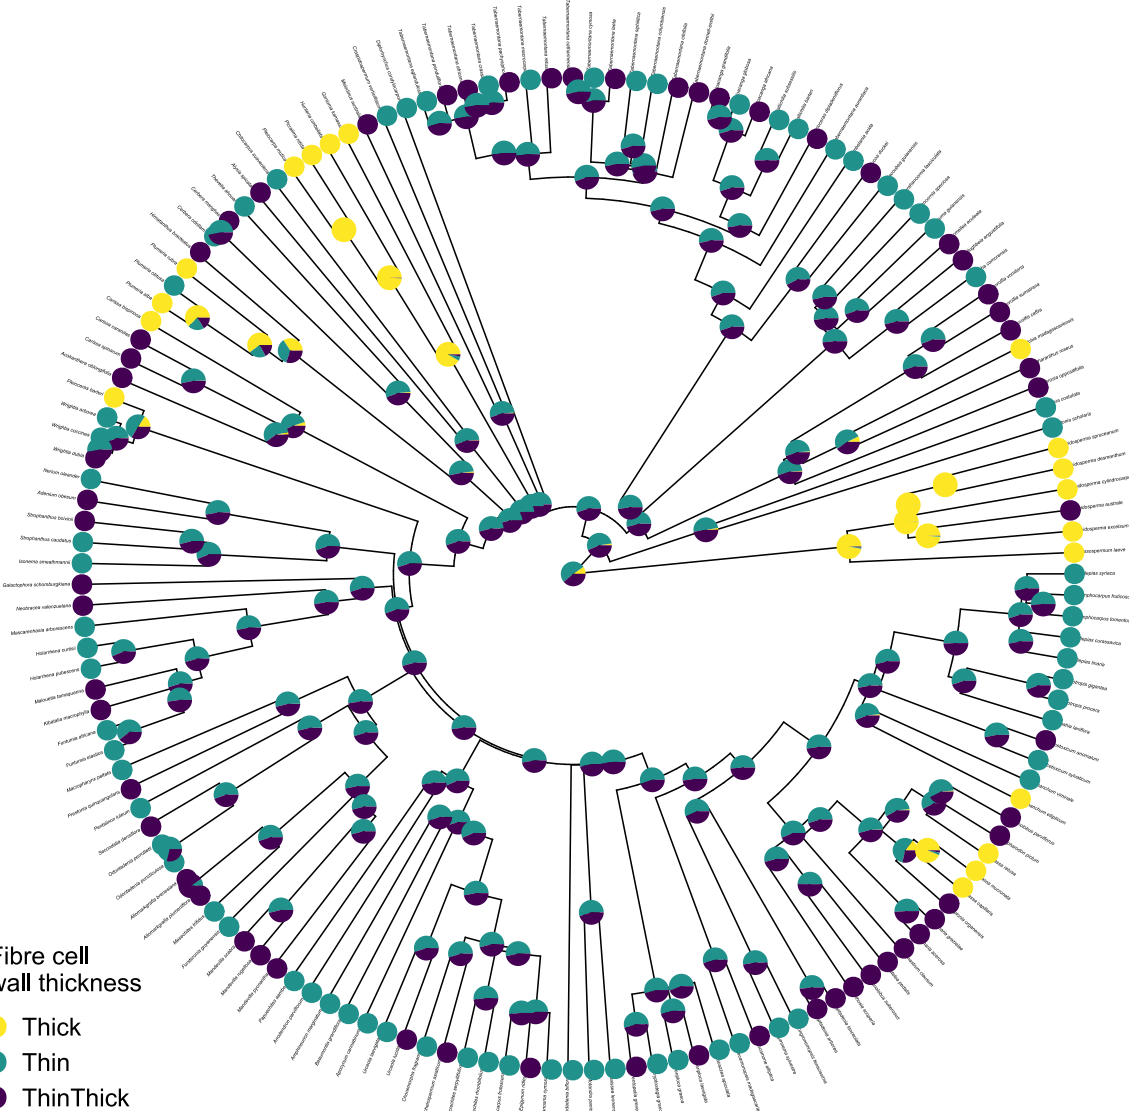

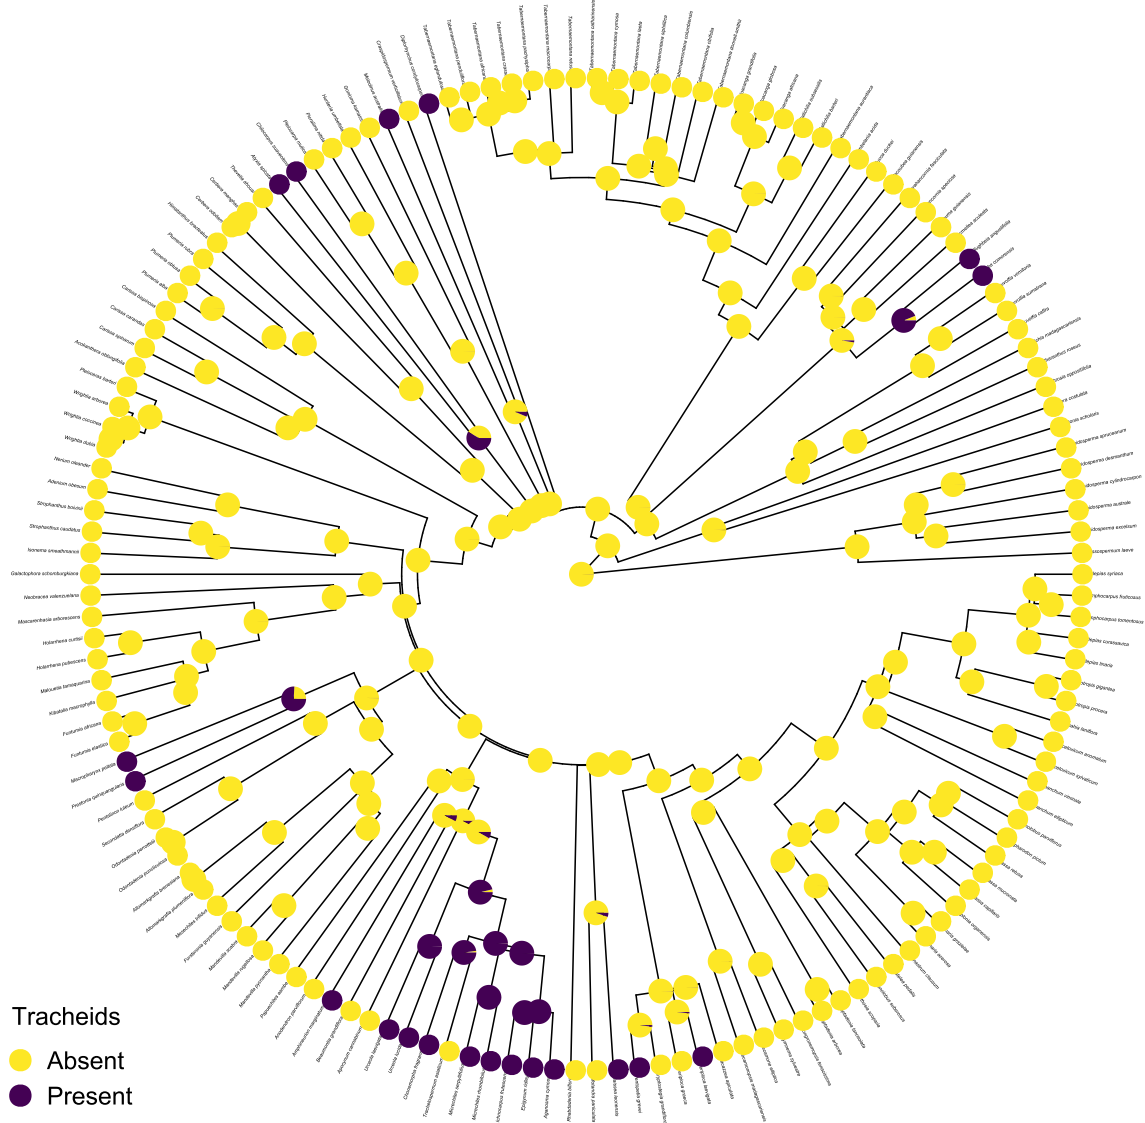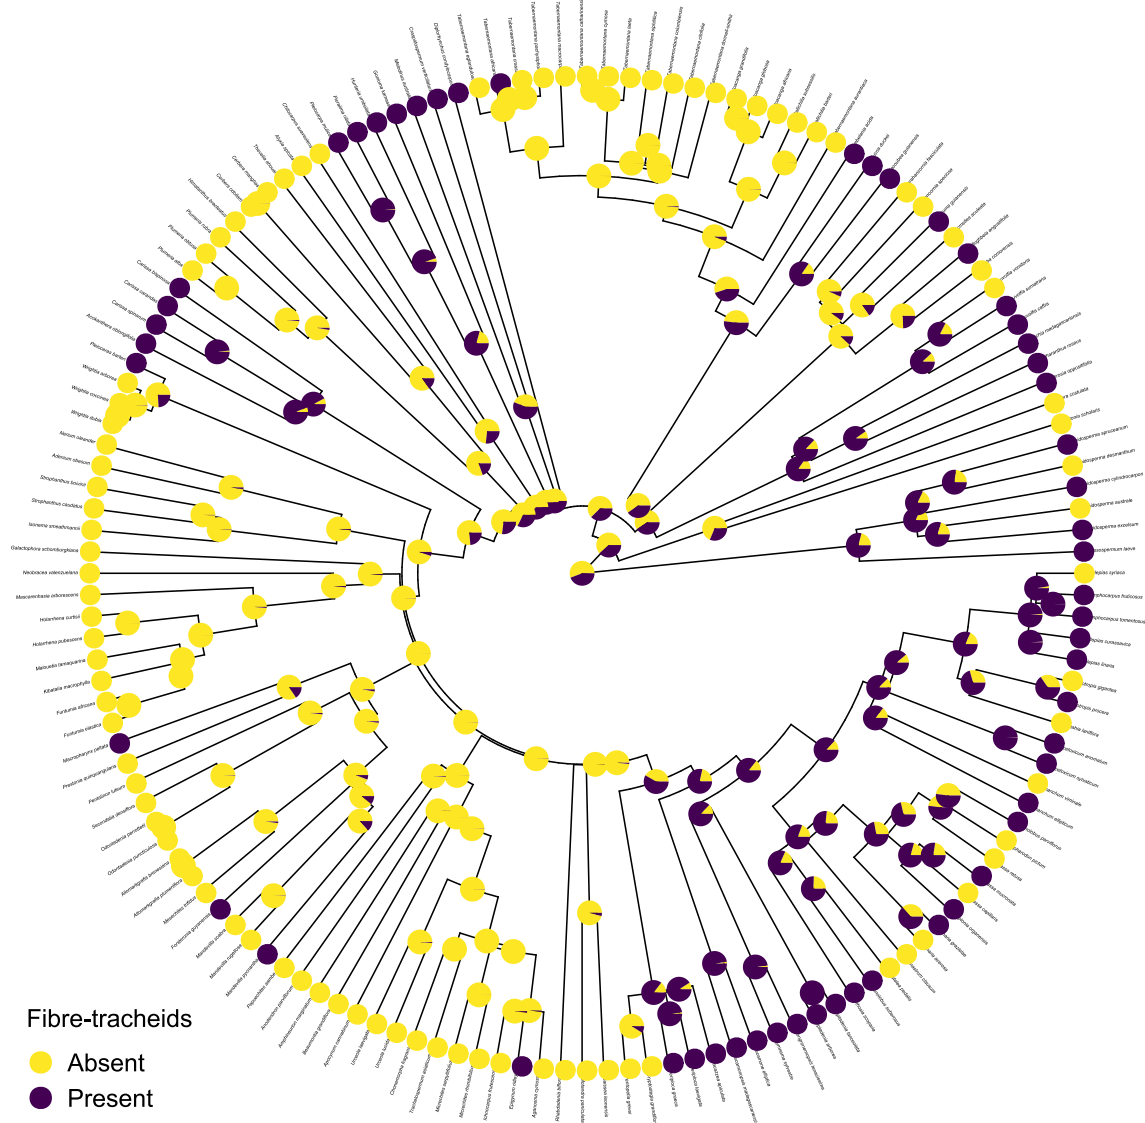

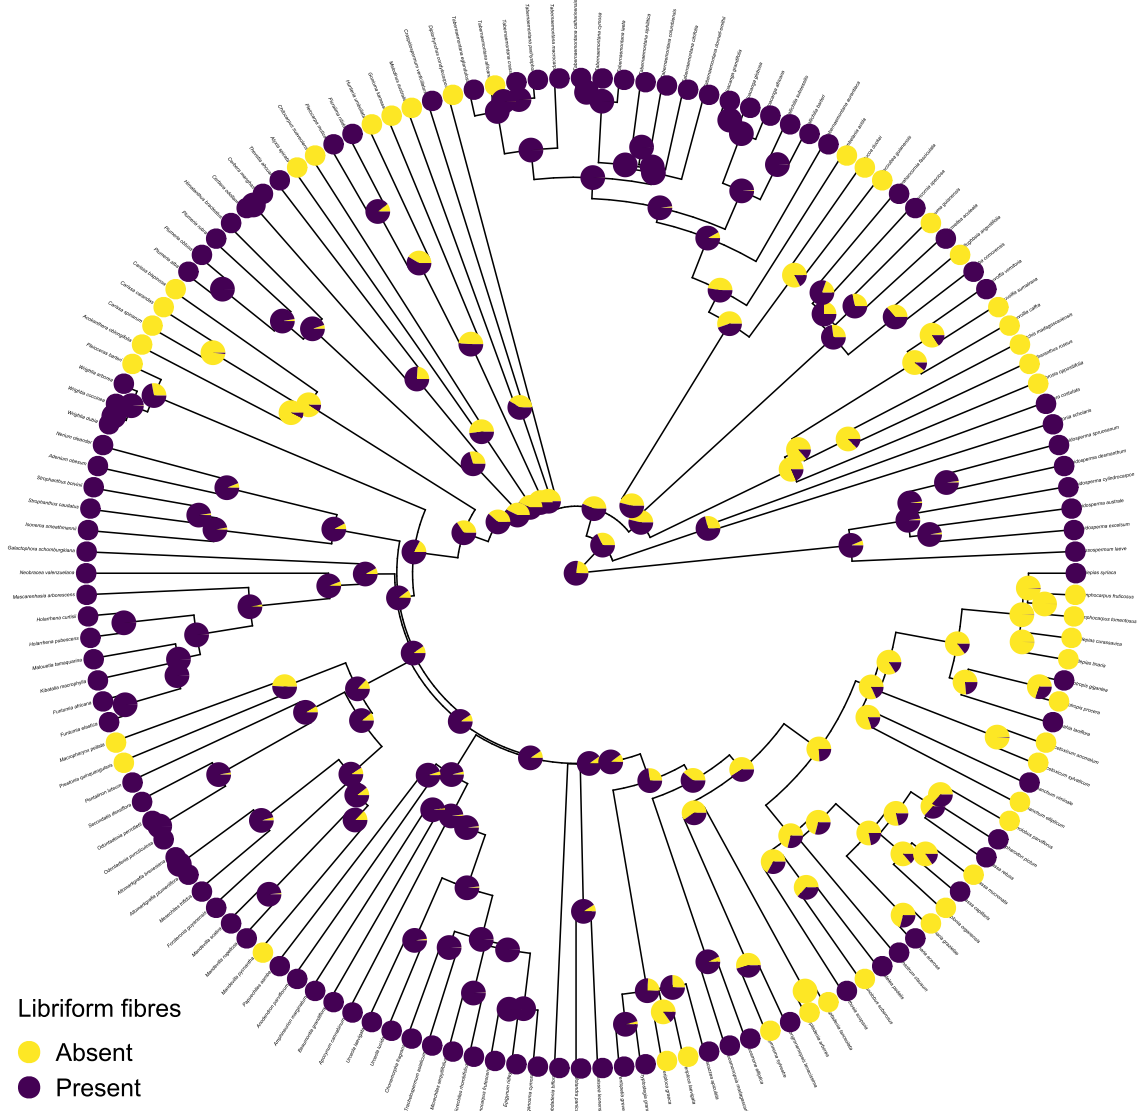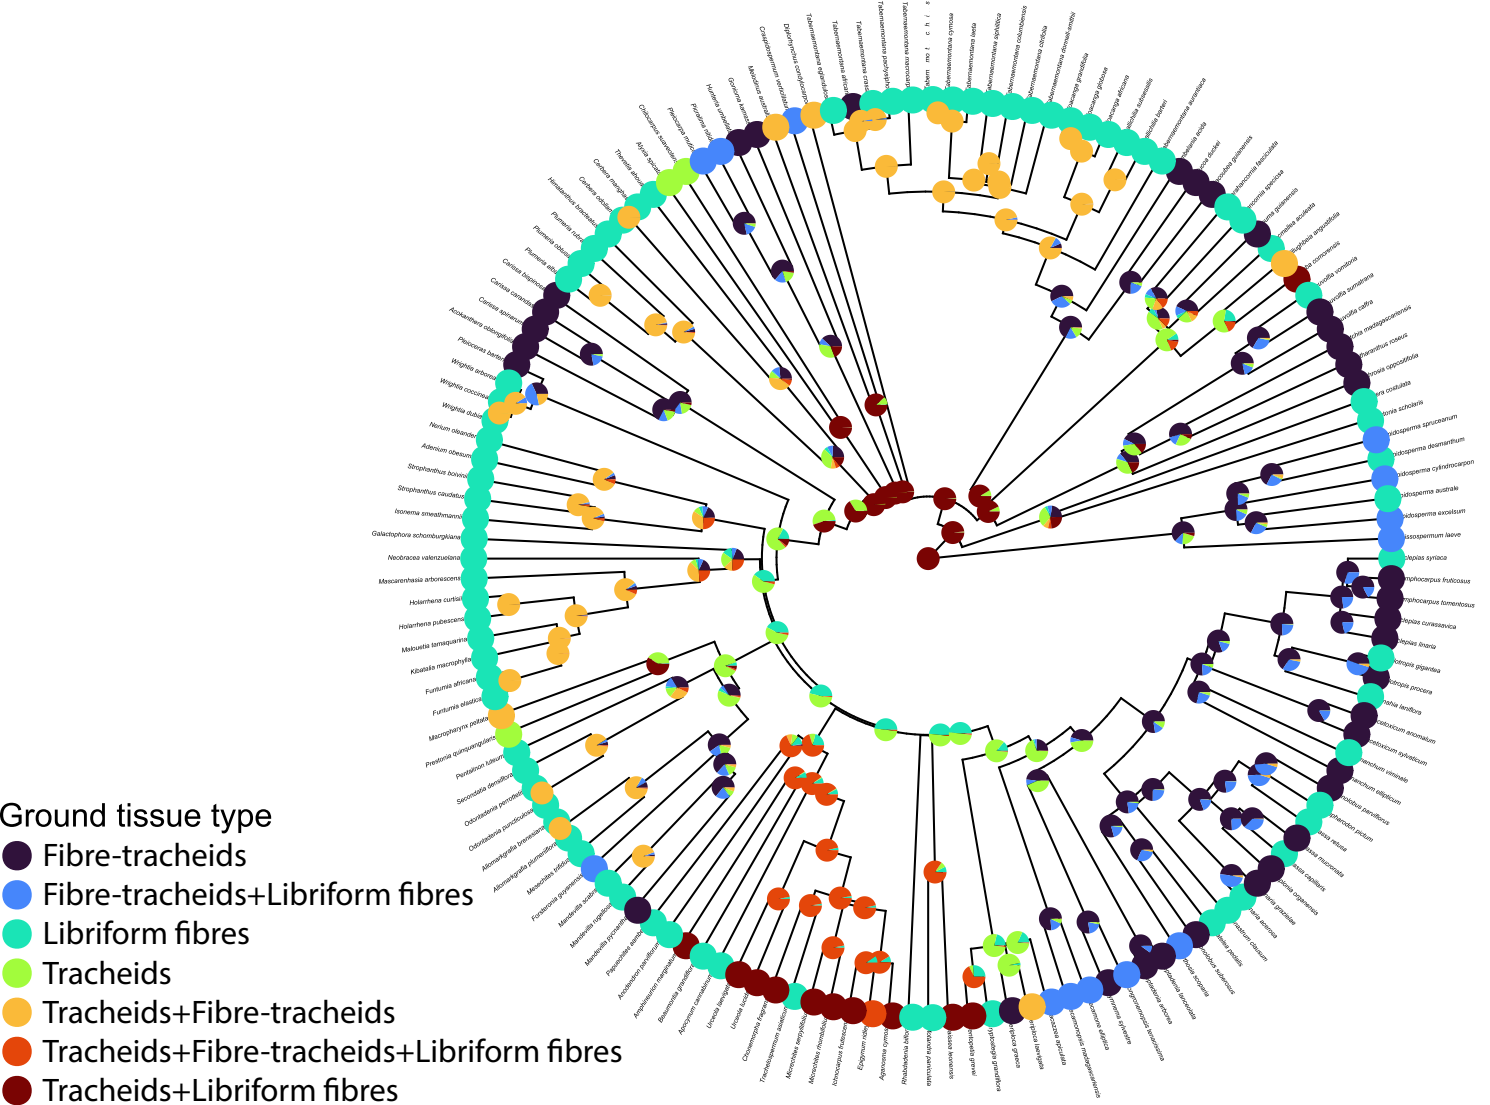





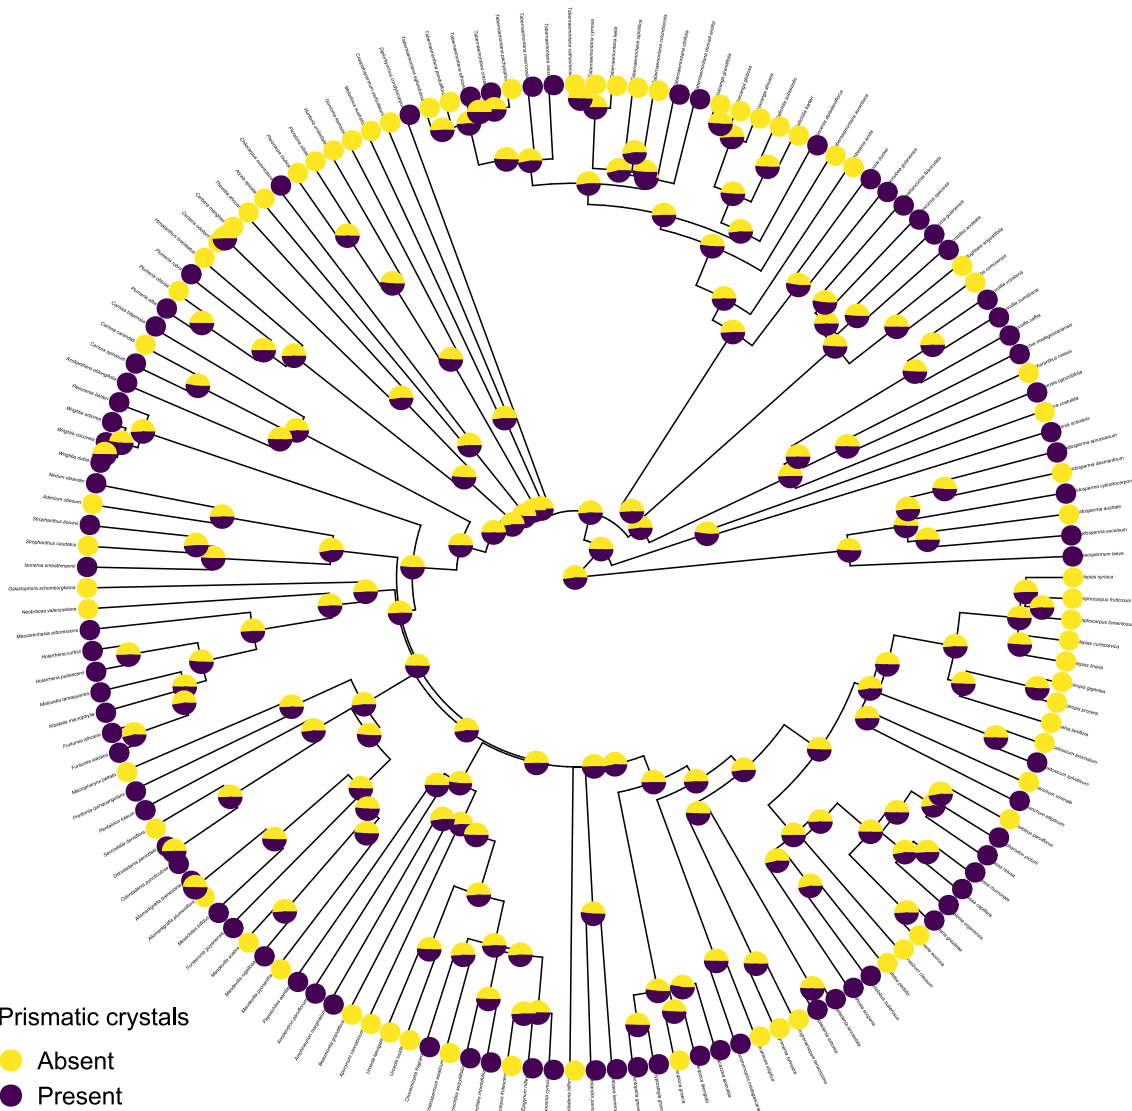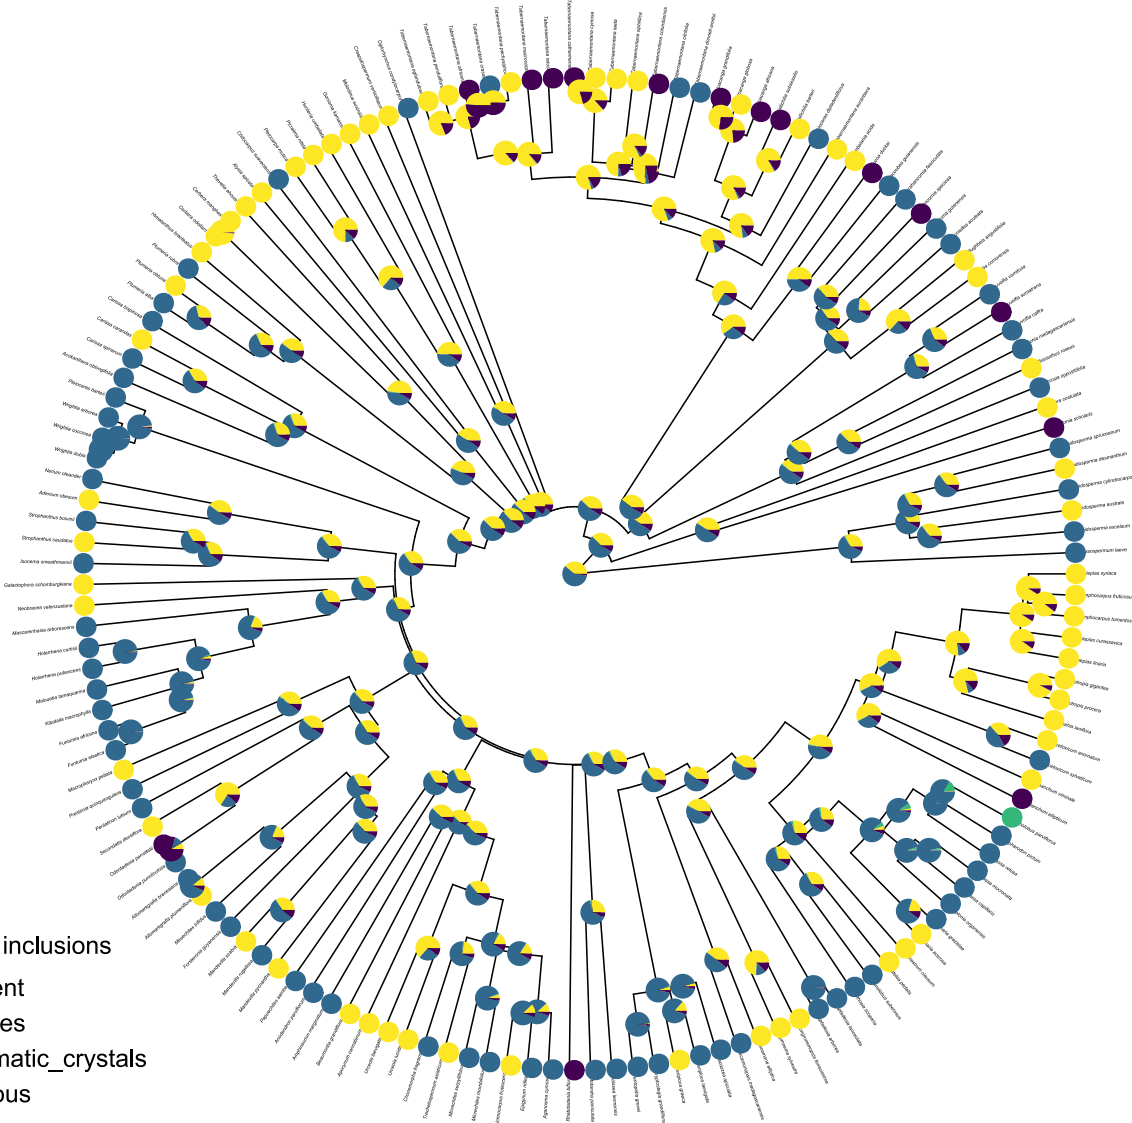

Supplement: AJB2-111-e16436-s005.pdf [file AJB2-111-e16436-s005.pdf]
